# Supplementary material for: Resolving omicron sub-variants of SARS CoV-2 coronavirus with MALDI mass spectrometry
Source: Royal Society of Chemistry journal article supplement (doi:10.1039/d2an01843h), 2023-01-01
Supplement: d2an01843h1.pdf [file d2an01843h1.pdf]

Supplementary Table

Detection of specific omicron lineage spike protein tryptic peptide biomarkers in clinical specimens and negative controls\*

| RT-PCR<br>copies/mL             | BA.1<br>(m/z 1841) |  |  |  | BA.2.75<br>(m/z 764 and 893) |  |  |  | BA.4 / BA.5<br>(m/z 942) |  |  |  | not<br>identified |  | negative controls<br>(no ions at m/z 764, 893, 942 or 1841) |  |  |  |  |  |  |  |  |  |  |  |
|---------------------------------|--------------------|--|--|--|------------------------------|--|--|--|--------------------------|--|--|--|-------------------|--|-------------------------------------------------------------|--|--|--|--|--|--|--|--|--|--|--|
| $5 \times 10^5 - 1 \times 10^6$ |                    |  |  |  |                              |  |  |  |                          |  |  |  |                   |  |                                                             |  |  |  |  |  |  |  |  |  |  |  |
| $1 \times 10^5 - 5 \times 10^5$ |                    |  |  |  |                              |  |  |  |                          |  |  |  |                   |  |                                                             |  |  |  |  |  |  |  |  |  |  |  |
| $5 \times 10^4 - 1 \times 10^5$ |                    |  |  |  |                              |  |  |  |                          |  |  |  |                   |  |                                                             |  |  |  |  |  |  |  |  |  |  |  |
| $< 5 \times 10^4$               |                    |  |  |  |                              |  |  |  |                          |  |  |  |                   |  |                                                             |  |  |  |  |  |  |  |  |  |  |  |
| none detected (-)               |                    |  |  |  |                              |  |  |  |                          |  |  |  |                   |  |                                                             |  |  |  |  |  |  |  |  |  |  |  |

\*specimens are denoted by boxes which are shaded green if a peptide biomarker was detected by SIM and red if not.
